# Supplementary material
Source: MDPI journal article supplement (https://www.mdpi.com/2073-4344/7/11/337)

Visible-Light Photocatalytic *E* to *Z* Isomerization of Activated Olefins and Its Application for the Syntheses of Coumarins

**Supporting Information**

**General Information**

All chemicals were purchased as reagent grade and used without further purification. Solvents for purification (extraction and chromatography) were purchased as technical grade and distilled on the rotary evaporator prior to use. For column chromatography, SiO2-60 (230-400 mesh) was used as stationary phase. Analytical thin layer chromatography (TLC) was performed on aluminium foil pre-coated with SiO2-60 F254 (Merck) and visualized with a UV-lamp (254 nm) and KMnO4 solution. Concentration in vacuo was performed at ~10 mbar and 40 °C. NMR spectra were measured by 400 MHz Bruker Avance III spectrometer. The resonance multiplicity is abbreviated as: s (singlet), d (doublet), t (triplet), q (quadruplet), m (multiplet) and b (broad). High resolution mass spectra (HRMS) analysis was performed on micro-TOF-Q II Bruker mass spectrometer with ESI as ionization source.

Gas Chromatography-Mass Spectrometry (GC-MS) was performed on Agilent 5975C Triple Axis GC-MS (EI/CI), equipped with J&W 122-5532 (325℃, 30m×250μm×0.25μm) column.

**General procedure for the preparation of starting materials, α, β-unsaturated carbonyl compounds**

To a solution of NaH (1.2 eq., 60% dispersion in mineral) in dry THF, a solution of triethylphosphonoacetate (1.1 eq.) in dry THF was added dropwise in ice bath. After 30 min, the suitable aldehyde or ketone (1 eq.) was added to the reaction mixture, which was then stirred for 1-2 days at room temperature. After the reaction completed, THF was evaporated under reduced pressure, and the residue was extracted with diethyl ether. The organic layer was dried over sodium sulfate and evaporated. Crude product was purified by the column chromatography on silica gel using n-hexane and ethyl acetate as eluent.

**1h**, **1i**, **1j** are commercially available, used as obtained.

**Ethyl (*E*) cinnamates, 1a**

Prepared according to general procedure, benzaldehyde (10 mmol) was converted to Ethyl-(*E*)-cinnamate in 24 hours yielding a colorless oil (1.18 g, 67%) after purification by column chromatography. 1H NMR (400 MHz, CDCl3) δ 7.69 (d, *J* = 16.0 Hz, 1H), 7.52 (dt, *J* = 5.7, 3.5 Hz, 2H), 7.38 (t, *J* = 3.3 Hz, 3H), 6.44 (d, *J* = 16.0 Hz, 1H), 4.27 (q, *J* = 7.1 Hz, 2H), 1.34 (t, *J* = 7.1 Hz, 3H). 13C NMR (101 MHz, CDCl3) δ 167.02, 144.59, 134.46, 130.22, 128.88, 128.05, 118.27, 77.34, 77.02, 76.70, 60.53, 14.34. HRMS(ESI): m/z: calcd for [(C11H12O2Na)+]: 199.0735; found: 199.0761.

**Ethyl (*E*)-3-(4-fluorophenyl)acrylate, 1b**

Prepared according to general procedure, 4-fluorobenzaldehyde (10 mmol) was converted to (E)-3-(4-fluorophenyl)acrylaldehyde in 24 hours yielding a colorless oil (1.09 g, 56%) after purification by column chromatography. 1H NMR (400 MHz, CDCl3) δ 7.65 (d, *J* = 16.0 Hz, 1H), 7.51 (dd, *J* = 8.6, 5.5 Hz, 2H), 7.07 (t, *J* = 8.6 Hz, 2H), 6.36 (d, *J* = 16.1 Hz, 1H), 4.26 (d, *J* = 7.2 Hz, 2H), 1.34 (t, *J* = 7.1 Hz, 3H). 13C NMR (101 MHz, CDCl3) δ 166.07, 164.24, 161.75, 142.12, 132.04, 131.96, 130.91, 130.87, 119.55, 119.53, 115.11, 114.89, 77.34, 77.02, 76.71, 60.35, 14.13. HRMS(ESI): m/z: calcd for [(C11H11O2FNa)+]: 217.0641; found: 217.0635.

**Ethyl (E)-3-(4-methoxyphenyl)acrylate, 1c**

Prepared according to general procedure, 4-methoxybenzaldehyde (10 mmol) was converted to Ethyl (*E*)-3-(4-methoxyphenyl)acrylate in 24 hours yielding a colorless oil (0.93 g, 45%) after purification by column chromatography. 1H NMR (400 MHz, CDCl3) δ 7.64 (d, *J* = 16.0 Hz, 1H), 7.55 – 7.38 (m, 2H), 6.99 – 6.77 (m, 2H), 6.31 (d, *J* = 15.9 Hz, 1H), 4.25 (q, *J* = 7.1 Hz, 2H), 3.83 (s, 3H), 1.33 (t, *J* = 7.1 Hz, 3H). 13C NMR (101 MHz, CDCl3) δ 167.33, 161.32, 144.23, 129.67, 127.22, 115.77, 114.31, 77.34, 77.02, 76.70, 60.32, 55.37, 14.36. HRMS(ESI): m/z: calcd for [(C12H14O3Na)+]: 229.0841; found: 229.0833.

**Ethyl (*E*)-3-(4-chlorophenyl)acrylate, 1d**

Prepared according to general procedure, 4-chlorobenzaldehyde (10 mmol) was converted to Ethyl (*E*)-3-(4-chlorophenyl)acrylate in 24 hours yielding a colorless oil (1.32 g, 63%) after purification by column chromatography. 1H NMR (400 MHz, CDCl3) δ 7.63 (d, *J* = 16.0 Hz, 1H), 7.45 (d, *J* = 8.4 Hz, 2H), 7.35 (d, *J* = 8.3 Hz, 2H), 6.40 (d, *J* = 16.0 Hz, 1H), 4.26 (q, *J* = 7.1 Hz, 2H), 1.33 (t, *J* = 7.1 Hz, 3H). 13C NMR (101 MHz, CDCl3) δ 166.73, 143.12, 136.12, 132.96, 129.19, 129.16, 118.88, 77.34, 77.02, 76.70, 60.63, 14.31. HRMS(ESI): m/z: calcd for [(C11H11O2ClNa)+]: 233.0345; found: 233.0354.

**Ethyl (*E*)-3-(4-(trifluoromethyl)phenyl)acrylate, 1e**

Prepared according to general procedure, 4-(trifluoromethyl)benzaldehyde (10 mmol) was converted to Ethyl (*E*)-3-(4-(trifluoromethyl)phenyl)acrylate in 24 hours yielding a colorless oil (1.27 g, 52%) after purification by column chromatography. 1H NMR (400 MHz, CDCl3) δ 7.81 – 7.52 (m, 5H), 6.51 (d, *J* = 16.0 Hz, 1H), 4.28 (q, *J* = 7.1 Hz, 2H), 1.35 (t, *J* = 7.1 Hz, 3H). 13C NMR (101 MHz, CDCl3) δ 166.41, 142.69, 137.83, 128.15, 125.91, 125.87, 125.83, 125.80, 120.86, 77.33, 77.01, 76.69, 60.81, 14.29. HRMS(ESI): m/z: calcd for [(C12H11F3O2Na)+]:267.0609; found: 267.0618.

**Ethyl (*E*)-3-(4-bromophenyl)acrylate, 1f**

Prepared according to general procedure, 4-bromobenzaldehyde (10 mmol) was converted to Ethyl (*E*)-3-(4-bromophenyl)acrylate in 24 hours yielding a colorless oil (1.87 g, 67%) after purification by column chromatography. 1H NMR (400 MHz, CDCl3) δ 7.61 (d, *J* = 16.0 Hz, 1H), 7.57 – 7.46 (m, 2H), 7.45 – 7.32 (m, 2H), 6.42 (d, *J* = 16.0 Hz, 1H), 4.26 (q, *J* = 7.1 Hz, 2H), 1.33 (t, *J* = 7.1 Hz, 4H). 13C NMR (101 MHz, CDCl3) δ 166.71, 143.18, 133.39, 132.13, 129.41, 124.45, 119.00, 77.33, 77.01, 76.69, 60.64, 14.31. HRMS(ESI): m/z: calcd for [(C11H11BrO2Na)+]:278.9820; found: 278.9839.

**Methyl cinnamates, 1g**

In a flask, MeOH was mixed with cinnamic acid (10 mmol, 1 e.q). The mixture was cooled to 0 oC, SOCl2 (1.4 e.q.) was added dropwise and stirred 1.5h at 0 oC, the continuously stirred at room temperature for 12h. After concentration under reduce pressure the residue was redissolved in DCM and concentrated K2CO3 solution was added. The product was extracted with DCM and the crude product was purified by flash chromatography yielding a white solid (1.48 g, 91%).1H NMR (400 MHz, CDCl3) δ 7.70 (d, *J* = 16.0 Hz, 1H), 7.53 (dd, *J* = 6.6, 3.0 Hz, 2H), 7.47 – 7.33 (m, 3H), 6.45 (d, *J* = 16.0 Hz, 1H), 3.81 (s, 3H). 13C NMR (101 MHz, CDCl3) δ 167.45, 144.89, 134.38, 130.31, 128.90, 128.08, 117.79, 77.34, 77.02, 76.70, 51.73. HRMS(ESI): m/z: calcd for [(C10H10O2Na)+]:185.0578; found: 185.0532.

**Ethyl (*E*)-3-phenylbut-2-enoate, 1k**

Prepared according to general procedure, acetophenone (10 mmol) was converted to Ethyl (*E*)-3-phenylbut-2-enoate in 24 hours yielding a colorless oil (0.86 g, 45%) after purification by column chromatography. 1H NMR (400 MHz, CDCl3) δ 7.46 – 7.32 (m, 2H), 7.27 (d, *J* = 5.5 Hz, 2H), 7.16 (s, 1H), 6.03 (s, 1H), 4.11 (q, *J* = 7.1 Hz, 2H), 2.48 (s, 3H), 1.22 (t, *J* = 7.1 Hz, 3H). 13C NMR (101 MHz, CDCl3) δ 166.88, 155.49, 142.25, 128.96, 128.48, 126.30, 117.20, 77.33, 77.01, 76.69, 59.85, 17.96, 14.35. HRMS(ESI): m/z: calcd for [(C12H14O2Na)+]:213.0891; found: 213.0912.

**Ethyl (*E*)-3-(p-tolyl)but-2-enoate, 1l**

Prepared according to general procedure, 1-(p-tolyl)ethan-1-one (10 mmol) was converted to Ethyl (*E*)-3-(p-tolyl)but-2-enoate in 24 hours yielding a colorless oil (1.12 g, 55%) after purification by column chromatography. 1H NMR (400 MHz, CDCl3) δ 7.39 (d, *J* = 8.2 Hz, 2H), 7.18 (d, *J* = 7.9 Hz, 2H), 6.23 – 6.02 (m, 1H), 4.21 (q, *J* = 7.2 Hz, 2H), 2.69 – 2.47 (m, 3H), 2.37 (s, 3H), 1.31 (t, *J* = 7.1 Hz, 3H). 13C NMR (101 MHz, CDCl3) δ 167.02, 155.42, 139.25, 139.13, 129.18, 126.22, 116.29, 77.34, 77.02, 76.70, 59.78, 21.20, 17.83, 14.37. HRMS(ESI): m/z: calcd for [(C13H16O2Na)+]:227.1048; found: 227.1069.

**Ethyl (*E*)-3-(thiophen-2-yl)but-2-enoate, 1n**

Prepared according to general procedure, 1-(thiophen-2-yl)ethan-1-one (10 mmol) was converted to Ethyl (*E*)-3-(thiophen-2-yl)but-2-enoate in 24 hours yielding a colorless oil (0.88 g, 45%) after purification by column chromatography. 1H NMR (400 MHz, CDCl3) δ 7.32 (d, *J* = 4.4 Hz, 2H), 7.05 (dd, *J* = 4.9, 3.8 Hz, 1H), 6.26 (t, *J* = 1.2 Hz, 1H), 4.20 (q, *J* = 7.1 Hz, 2H), 2.61 (d, *J* = 1.2 Hz, 3H), 1.31 (t, *J* = 7.1 Hz, 3H). 13C NMR (101 MHz, CDCl3) δ 166.72, 147.74, 145.56, 127.89, 127.02, 126.64, 114.26, 77.32, 77.00, 76.68, 59.85, 17.28, 14.33. HRMS(ESI): m/z: calcd for [(C10H12O2SNa)+]:219.0456; found: 219.0477.

**Ethyl (*E*)-3-(pyridin-3-yl)acrylate, 1p**

Prepared according to general procedure, 1-(pyridin-3-yl)ethan-1-one (10 mmol) was converted to Ethyl (*E*)-3-(pyridin-3-yl)acrylate in 24 hours yielding a colorless oil (0.80 g, 45%) after purification by column chromatography. 1H NMR (400 MHz, CDCl3) δ 8.72 (s, 1H), 8.59 (d, *J* = 4.6 Hz, 1H), 7.89 – 7.70 (m, 1H), 7.32 (d, *J* = 6.5 Hz, 1H), 6.14 (dd, *J* = 2.6, 1.4 Hz, 1H), 4.22 (qd, *J* = 7.1, 1.6 Hz, 2H), 2.33 – 2.02 (m, 11H), 1.41 – 1.23 (m, 4H). 13C NMR (101 MHz, CDCl3) δ 166.27, 151.89, 149.77, 147.32, 137.75, 133.75, 123.32, 118.73, 77.36, 77.04, 76.72, 60.13, 17.72, 14.30. HRMS(ESI): m/z: calcd for [(C10H11O2NH)+]:192.1025; found: 192.1056.

**General procedure for the isomerization of** **α,β-unsaturated carbonyl compounds**

The specified α,β-unsaturated carbonyl compound (0.2 mmol, 1 eq.) and *fac*-Ir(ppy)3 (0.002 mmol, 1 mol % ) were dissolved in 2 mL MeCN, the mixture was stirred under blue LED irradiation for 24 h at room temperature. The reaction was monitored by GC-MS. After the *trans*-isomer reaches to maximum conversion to *cis*-isomer, MeCN was removed under reduced pressure. The crude product was purified by flash chromatography using *n*-hexane and diethyl ether as eluent.

**Ethyl (*Z*)-3-phenylacrylate, 2a**

According to general procedure, ethyl (*Z*)-3-phenylacrylate was afforded in 75% yield (26 mg, 0.15 mmol) as a colorless oil. 1H NMR (400 MHz, CDCl3) δ 7.65 – 7.50 (m, 2H), 7.43 – 7.29 (m, 3H), 6.95 (d, *J* = 12.6 Hz, 1H), 5.95 (d, *J* = 12.6 Hz, 1H), 4.18 (q, *J* = 7.1 Hz, 2H), 1.25 (t, *J* = 7.1 Hz, 3H). 13C NMR (101 MHz, CDCl3) δ 166.24, 143.00, 134.88, 129.68, 128.97, 127.99, 119.90, 77.35, 77.04, 76.72, 60.32, 14.10. HRMS(ESI): m/z: calcd for [(C11H12O2Na)+]: 199.0735; found: 199.0761.

**Ethyl (*Z*)-3-(4-fluorophenyl)acrylate, 2b**

According to general procedure, ethyl (*Z*)-3-(4-fluorophenyl)acrylate was afforded in 77% yield (30 mg, 0.15 mmol) as a colorless oil. 1H NMR (400 MHz, CDCl3) δ 7.70 – 7.56 (m, 2H), 7.03 (t, *J* = 8.7 Hz, 2H), 6.89 (d, *J* = 12.7 Hz, 1H), 5.93 (d, *J* = 12.6 Hz, 1H), 4.18 (q, *J* = 7.1 Hz, 2H), 1.26 (t, *J* = 7.1 Hz, 3H). 13C NMR (101 MHz, CDCl3) δ 166.07, 164.24, 161.75, 142.12, 132.04, 131.96, 130.91, 130.87, 119.55, 119.53, 115.11, 114.89, 77.34, 77.23, 77.02, 76.71, 60.35, 14.13. HRMS(ESI): m/z: calcd for [(C11H11O2FNa)+]: 217.0641; found: 217.0635.

**Ethyl (*Z*)-3-(4-methoxyphenyl)acrylate, 2c**

According to general procedure, ethyl (Z)-3-(4-methoxyphenyl)acrylate was afforded in 74% yield (31 mg, 0.15 mmol) as a colorless oil. 1H NMR (400 MHz, Chloroform-*d*) δ 7.79 – 7.62 (m, 2H), 6.96 – 6.74 (m, 3H), 5.83 (d, *J* = 12.7 Hz, 1H), 4.19 (q, *J* = 7.1 Hz, 2H), 3.83 (s, 3H), 1.28 (t, *J* = 7.1 Hz, 3H). 13C NMR (101 MHz, CDCl3) δ 166.46, 160.38, 143.14, 132.12, 127.40, 117.28, 113.39, 77.33, 77.01, 76.69, 60.14, 55.29, 14.21. HRMS(ESI): m/z: calcd for [(C12H14O3Na)+]: 229.0841; found: 229.0833.

**Ethyl (*Z*)-3-(4-chlorophenyl)acrylate, 2d**

According to general procedure, ethyl (*Z*)-3-(4-chlorophenyl)acrylate was afforded in 74% yield (31 mg, 0.15 mmol) as a colorless oil. 1H NMR (400 MHz, CDCl3) δ 7.54 (d, *J* = 8.4 Hz, 2H), 7.38 – 7.28 (m, 2H), 6.88 (d, *J* = 12.6 Hz, 1H), 5.96 (d, *J* = 12.6 Hz, 1H), 4.18 (q, *J* = 7.1 Hz, 2H), 1.26 (t, *J* = 7.2 Hz, 3H). 13C NMR (101 MHz, CDCl3) δ 165.95, 141.86, 134.91, 133.24, 131.17, 128.21, 120.39, 77.36, 77.04, 76.72, 60.43, 14.12. HRMS(ESI): m/z: calcd for [(C11H11O2ClNa)+]: 233.0345; found: 233.0354.

**Ethyl (*Z*)-3-(4-(trifluoromethyl)phenyl)acrylate, 2e**

According to general procedure, ethyl (*Z*)-3-(4-(trifluoromethyl)phenyl)acrylate was afforded in 60% yield (29 mg, 0.12 mmol) as a colorless oil. 1H NMR (400 MHz, CDCl3) δ 7.73 – 7.52 (m, 4H), 6.98 (d, *J* = 12.5 Hz, 1H), 6.06 (d, *J* = 12.5 Hz, 1H), 4.17 (q, *J* = 7.1 Hz, 2H), 1.24 (t, *J* = 7.1 Hz, 3H). 13C NMR (101 MHz, CDCl3) δ 165.65, 141.44, 138.47, 138.46, 129.66, 124.91, 124.87, 122.09, 77.33, 77.02, 76.70, 60.55, 14.04. HRMS(ESI): m/z: calcd for [(C12H11F3O2Na)+]:267.0609; found: 267.0618.

**Ethyl (*Z*)-3-(4-bromophenyl)acrylate, 2f**

According to general procedure, ethyl (*Z*)-3-(4-bromophenyl)acrylate was afforded in 71% yield (36 mg, 0.14 mmol) as a colorless oil. 1H NMR (400 MHz, CDCl3) δ 7.47 (s, 4H), 6.86 (d, *J* = 12.6 Hz, 1H), 5.97 (d, *J* = 12.6 Hz, 1H), 4.17 (q, *J* = 7.1 Hz, 2H), 1.25 (t, *J* = 7.1 Hz, 3H). 13C NMR (101 MHz, CDCl3) δ 165.93, 141.90, 133.69, 131.37, 131.17, 123.26, 120.53, 77.36, 77.04, 76.72, 60.45, 14.12. HRMS(ESI): m/z: calcd for [(C11H11BrO2Na)+]:278.9820; found: 278.9839.

**Methyl (*Z*)-3-phenylacrylate, 2g**

According to general procedure, methyl (*Z*)-3-phenylacrylate was afforded in 64% yield (21 mg, 0.13 mmol) as a white solid. 1H NMR (400 MHz, CDCl3) δ 7.59 (dd, *J* = 7.6, 1.9 Hz, 2H), 7.35 (d, *J* = 7.2 Hz, 3H), 6.96 (d, *J* = 12.6 Hz, 1H), 5.96 (d, *J* = 12.6 Hz, 1H), 3.71 (s, 3H). 13C NMR (101 MHz, CDCl3) δ 166.59, 143.36, 134.78, 129.69, 129.06, 128.03, 119.30, 77.33, 77.01, 76.69, 51.36. HRMS(ESI): m/z: calcd for [(C10H10O2Na)+]:185.0578; found: 185.0532.

**(*Z*)-3-phenylacrylaldehyde, 2h**

According to general procedure, (*Z*)-3-phenylacrylaldehyde was afforded in 54% yield (14 mg, 0.11 mmol) as a colorless oil. 1H NMR (400 MHz, CDCl3) δ 9.97 (d, *J* = 8.1 Hz, 1H), 7.63 (d, *J* = 11.6 Hz, 1H), 7.42 (q, *J* = 5.5, 4.9 Hz, 5H), 6.20 (dd, *J* = 11.6, 8.1 Hz, 1H). 13C NMR (101 MHz, CDCl3) δ 192.60, 148.69, 134.20, 130.47, 129.83, 129.76, 129.12, 128.63, 128.51, 77.35, 77.03, 76.71. HRMS(ESI): m/z: calcd for [(C9H8ONa)+]:155.0473; found: 155.0459.

**Ethyl (*Z*)-3-phenylbut-2-enoate, 2k**

According to general procedure, ethyl (*Z*)-3-phenylbut-2-enoate was afforded in 90% yield (34 mg, 0.18 mmol) as a white solid. 1H NMR (400 MHz, CDCl3) δ 7.39 – 7.28 (m, 3H), 7.24 – 7.18 (m, 2H), 5.92 (d, *J* = 1.6 Hz, 1H), 4.00 (q, *J* = 7.1 Hz, 2H), 2.19 (d, *J* = 1.5 Hz, 3H), 1.09 (t, *J* = 7.1 Hz, 3H). 13C NMR (101 MHz, CDCl3) δ 165.93, 155.37, 140.88, 127.90, 127.73, 126.82, 117.80, 77.38, 77.06, 76.74, 59.76, 27.17, 13.98. HRMS(ESI): m/z: calcd for [(C12H14O2Na)+]:213.0891; found: 213.0912.

**Ethyl (*Z*)-3-(p-tolyl)but-2-enoate, 1l**

According to general procedure, ethyl (*Z*)-3-(p-tolyl)but-2-enoate was afforded in 98% yield (40 mg, 0.19 mmol) as a white solid. 1H NMR (400 MHz, CDCl3) δ 7.15 (q, *J* = 8.0 Hz, 4H), 5.90 (d, *J* = 1.7 Hz, 1H), 4.03 (q, *J* = 7.1 Hz, 2H), 2.37 (s, 3H), 2.18 (d, *J* = 1.5 Hz, 3H), 1.13 (t, *J* = 7.1 Hz, 3H). 13C NMR (101 MHz, CDCl3) δ 166.00, 155.56, 137.74, 137.61, 128.59, 126.87, 117.37, 77.39, 77.07, 76.76, 59.73, 27.17, 21.30, 14.07. HRMS(ESI): m/z: calcd for [(C13H16O2Na)+]:227.1048; found: 227.1069.

**Ethyl (Z)-3-phenylpent-2-enoate, 2m**

According to general procedure, ethyl (*Z*)-3-phenylpent-2-enoate was afforded in 92% yield (38 mg, 0.18 mmol) as a white solid. 1H NMR (400 MHz, CDCl3) δ 7.39 – 7.27 (m, 3H), 7.15 (dd, *J* = 7.9, 1.6 Hz, 2H), 5.87 (t, *J* = 1.4 Hz, 1H), 3.99 (q, *J* = 7.1 Hz, 2H), 2.46 (qd, *J* = 7.4, 1.5 Hz, 2H), 1.06 (td, *J* = 7.3, 1.8 Hz, 6H). 13C NMR (101 MHz, CDCl3) δ 166.23, 161.07, 140.51, 127.83, 127.49, 126.99, 116.31, 77.37, 77.05, 76.73, 59.75, 33.38, 13.96, 12.09. HRMS(ESI): m/z: calcd for [(C13H16O2Na)+]:227.1048; found: 227.1081.

**Ethyl (*Z*)-3-(thiophen-2-yl)but-2-enoate, 2n**

According to general procedure, ethyl (*Z*)-3-(thiophen-2-yl)but-2-enoate was afforded in 51% yield (20 mg, 0.10 mmol) as a colorless oil. 1H NMR (400 MHz, CDCl3) δ 7.47 (dd, *J* = 3.8, 1.1 Hz, 1H), 7.38 (dd, *J* = 5.0, 1.1 Hz, 1H), 7.03 (dd, *J* = 5.1, 3.7 Hz, 1H), 5.85 (d, *J* = 1.3 Hz, 1H), 4.15 (q, *J* = 7.1 Hz, 2H), 2.29 (d, *J* = 1.2 Hz, 3H), 1.24 (t, *J* = 7.1 Hz, 3H). 13C NMR (101 MHz, CDCl3) δ 166.05, 144.37, 140.26, 129.10, 127.55, 126.71, 116.58, 77.39, 77.08, 76.76, 60.09, 27.50, 14.18. HRMS(ESI): m/z: calcd for [(C10H12O2SNa)+]:219.0456; found: 219.0477.

**Ethyl (*Z*)-3-(pyridin-3-yl)but-2-enoate, 2p**

According to general procedure, ethyl (*Z*)-3-(pyridin-3-yl)but-2-enoate was afforded in 70% yield (27 mg, 0.14 mmol) as a colorless oil. 1H NMR (400 MHz, CDCl3) δ 8.71 (d, *J* = 2.3 Hz, 1H), 8.58 (dd, *J* = 4.8, 1.5 Hz, 1H), 7.76 (dt, *J* = 8.0, 1.8 Hz, 1H), 7.31 (dd, *J* = 8.0, 4.8 Hz, 1H), 6.13 (t, *J* = 1.4 Hz, 1H), 4.21 (q, *J* = 7.1 Hz, 2H), 2.56 (d, *J* = 1.3 Hz, 3H), 1.31 (t, *J* = 7.1 Hz, 3H). 13C NMR (101 MHz, CDCl3) δ 166.27, 151.89, 149.77, 147.32, 137.75, 133.75, 123.32, 118.73, 77.36, 77.04, 76.72, 60.13, 17.72, 14.30. HRMS(ESI): m/z: calcd for [(C10H11O2NH)+]:192.1025; found: 192.1056.


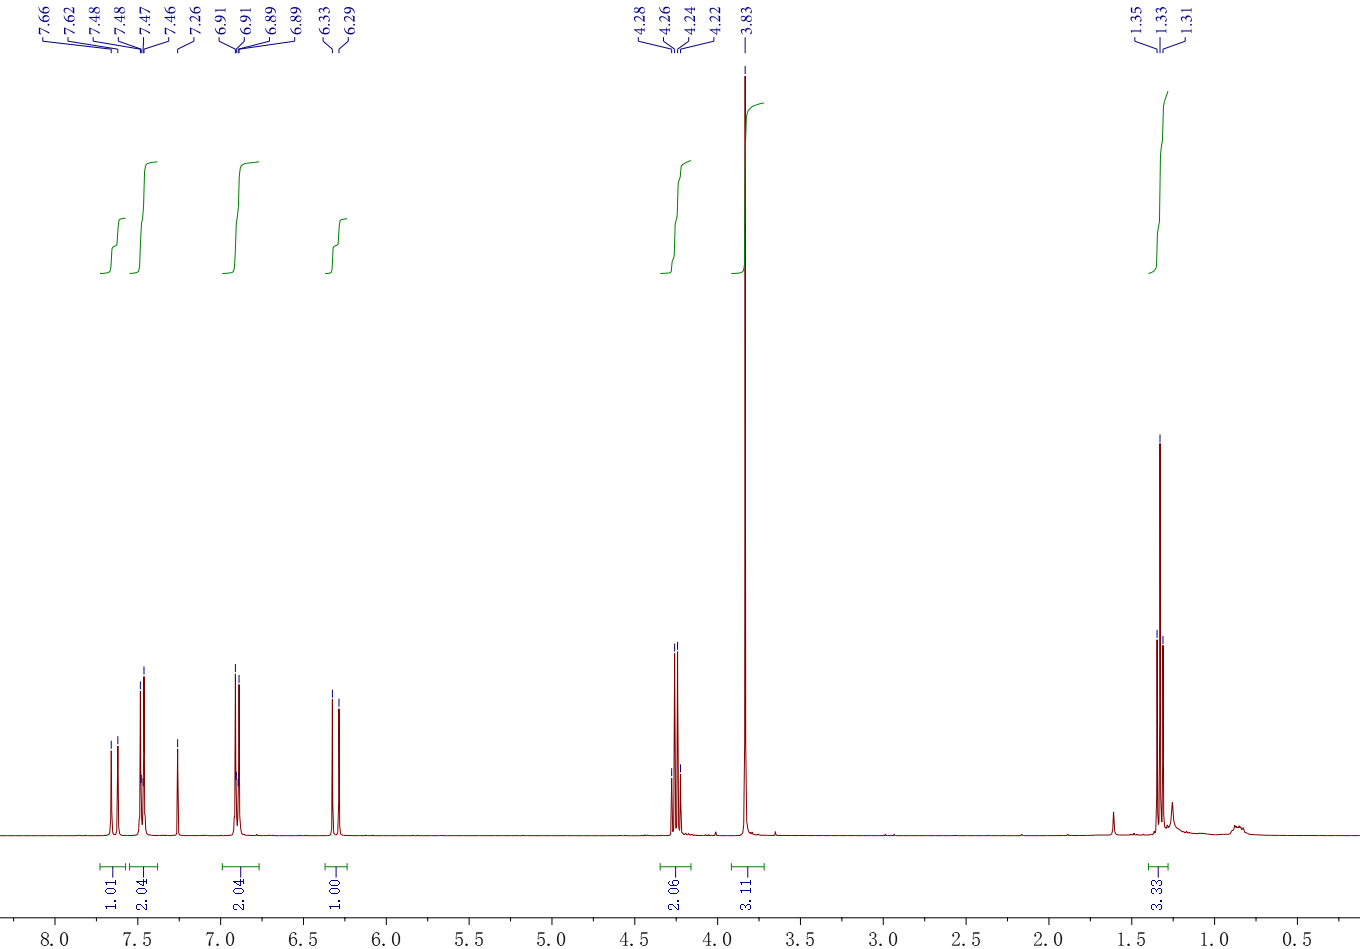


**General procedure for the preparation of starting materials, ortho-hydroxycinnamates**

To a solution of salicylaldehyde (10 mmol, 1 eq.) in dry CH2Cl2 (40 mL) was added (carbethoxymethylene)triphenylphosphorane (15 mmol, 1.5 eq.) and the mixture was stirred at room temperature for 2h. After reaction completed, the solvent was concentrated under reduced pressure. The residue was purified by flash chromatography using *n*-hexane and ethyl acetate as eluent.

**Ethyl (*E*)-3-(2-hydroxyphenyl)acrylate, 3a**

Prepared according to general procedure, salicylaldehyde (10 mmol) was converted to ethyl (*E*)-3-(2-hydroxyphenyl)acrylate in 2 hours yielding a white solide (1.09 g, 67%) after purification by column chromatography. 1H NMR (400 MHz, CDCl3) δ 8.01 (d, *J* = 16.1 Hz, 1H), 7.48 (dd, *J* = 7.7, 1.6 Hz, 1H), 7.26 – 7.21 (m, 1H), 6.93 (td, *J* = 7.6, 1.1 Hz, 1H), 6.83 (dd, *J* = 8.1, 1.0 Hz, 1H), 6.62 (d, *J* = 16.1 Hz, 1H), 6.12 (d, *J* = 9.3 Hz, 1H), 4.29 (q, *J* = 7.1 Hz, 2H), 1.35 (t, *J* = 7.1 Hz, 3H). 13C NMR (101 MHz, CDCl3) δ 168.05, 155.03, 140.14, 131.34, 129.21, 121.77, 120.93, 118.80, 116.36, 77.33, 77.01, 76.70, 60.60, 14.35. HRMS(ESI): m/z: calcd for [(C11H12O3Na)+]: 215.0684; found: 215.0673.

**Ethyl (*E*)-3-(2-hydroxy-3-methoxyphenyl)acrylate, 3b**

Prepared according to general procedure, 2-hydroxy-3-methoxybenzaldehyde (10 mmol) was converted to ethyl (*E*)-3-(2-hydroxy-3-methoxyphenyl)acrylate in 2 hours yielding a white solide (1.71 g, 77%) after purification by column chromatography. 1H NMR (400 MHz, CDCl3) δ 7.94 (d, *J* = 16.1 Hz, 1H), 7.08 (dd, *J* = 6.9, 2.6 Hz, 1H), 6.95 – 6.75 (m, 2H), 6.60 (d, *J* = 16.2 Hz, 1H), 6.15 (s, 1H), 4.26 (q, *J* = 7.1 Hz, 2H), 3.91 (s, 3H), 1.58 (d, *J* = 1.0 Hz, 3H), 1.34 (t, *J* = 7.1 Hz, 3H). 13C NMR (101 MHz, CDCl3) δ 167.51, 146.77, 145.28, 139.48, 120.93, 120.83, 119.64, 119.33, 111.64, 77.34, 77.02, 76.70, 60.36, 56.18, 14.37. HRMS(ESI): m/z: calcd for [(C12H14O4Na)+]: 245.0790; found: 245.0779.

**Ethyl (*E*)-3-(2-hydroxy-5-methylphenyl)acrylate, 3c**

Prepared according to general procedure, 2-hydroxy-5-methylbenzaldehyde (10 mmol) was converted to ethyl (*E*)-3-(2-hydroxy-5-methylphenyl)acrylate in 2 hours yielding a white solide (1.30 g, 63%) after purification by column chromatography. 1H NMR (400 MHz, CDCl3) δ 7.98 (d, *J* = 16.1 Hz, 1H), 7.27 (d, *J* = 2.1 Hz, 1H), 7.04 (dd, *J* = 8.2, 2.2 Hz, 1H), 6.74 (d, *J* = 8.2 Hz, 1H), 6.59 (d, *J* = 16.1 Hz, 1H), 4.28 (q, *J* = 7.1 Hz, 2H), 2.27 (s, 3H), 1.34 (t, *J* = 7.1 Hz, 3H). 13C NMR (101 MHz, CDCl3) δ 168.19, 153.05, 140.39, 132.06, 129.96, 129.36, 121.38, 118.37, 116.26, 77.34, 77.03, 76.71, 60.58, 20.44, 14.35. HRMS(ESI): m/z: calcd for [(C12H14O3Na)+]: 229.0841; found: 229.0828.

**Ethyl (*E*)-3-(5-chloro-2-hydroxyphenyl)acrylate, 3d**

Prepared according to general procedure, 5-chloro-2-hydroxybenzaldehyde (10 mmol) was converted to ethyl (*E*)-3-(5-chloro-2-hydroxyphenyl)acrylate in 2 hours yielding a white solide (1.22 g, 54%) after purification by column chromatography. 1H NMR (400 MHz, CDCl3) δ 7.96 (d, *J* = 16.2 Hz, 1H), 7.43 (d, *J* = 2.5 Hz, 1H), 7.18 (dd, *J* = 8.6, 2.5 Hz, 1H), 6.81 (d, *J* = 8.6 Hz, 1H), 6.61 (d, *J* = 16.2 Hz, 1H), 4.29 (q, *J* = 7.1 Hz, 2H), 1.35 (t, *J* = 7.1 Hz, 3H). 13C NMR (101 MHz, CDCl3) δ 168.23, 153.93, 139.23, 130.97, 128.36, 125.56, 123.12, 119.47, 117.70, 77.34, 77.02, 76.70, 60.95, 14.29. HRMS(ESI): m/z: calcd for [(C11H11ClO3Na)+]: 249.0294; found: 249.0279.

**Ethyl (*E*)-3-(5-bromo-2-hydroxyphenyl)acrylate, 3e**

Prepared according to general procedure, 5-bromo-2-hydroxybenzaldehyde (10 mmol) was converted to ethyl (*E*)-3-(5-bromo-2-hydroxyphenyl)acrylate in 2 hours yielding a white solide (1.62 g, 60%) after purification by column chromatography. 1H NMR (400 MHz, CDCl3) δ 7.97 (d, *J* = 16.2 Hz, 1H), 7.57 (d, *J* = 2.4 Hz, 1H), 7.31 (dd, *J* = 8.7, 2.4 Hz, 1H), 6.77 (d, *J* = 8.6 Hz, 1H), 6.63 (d, *J* = 16.2 Hz, 1H), 4.30 (q, *J* = 7.1 Hz, 2H), 1.35 (t, *J* = 7.1 Hz, 3H). 13C NMR (101 MHz, CDCl3) δ 168.49, 154.61, 139.40, 133.88, 131.35, 123.65, 119.28, 118.16, 112.56, 77.35, 77.03, 76.71, 61.03, 14.28.

HRMS(ESI): m/z: calcd for [(C11H11BrO3Na)+]: 292.9789; found: 292.9778.

**Ethyl (*E*)-3-(3,5-dichloro-2-hydroxyphenyl)acrylate, 3f**

Prepared according to general procedure, 3,5-dichloro-2-hydroxybenzaldehyde (10 mmol) was converted to ethyl (*E*)-3-(3,5-dichloro-2-hydroxyphenyl)acrylate in 2 hours yielding a white solide (1.17 g, 45%) after purification by column chromatography. 1H NMR (400 MHz, CDCl3) δ 7.85 (d, *J* = 16.1 Hz, 1H), 7.36 (dd, *J* = 15.2, 2.5 Hz, 2H), 6.57 (d, *J* = 16.2 Hz, 1H), 4.27 (q, *J* = 7.1 Hz, 2H), 1.34 (t, *J* = 7.1 Hz, 3H). 13C NMR (101 MHz, CDCl3) δ 166.74, 148.98, 137.54, 129.52, 127.32, 125.60, 123.87, 121.54, 121.39, 77.34, 77.22, 77.02, 76.70, 60.74, 14.31. HRMS(ESI): m/z: calcd for [(C11H10Cl2O3Na)+]: 282.9905; found: 282.9915.

**Ethyl (*E*)-3-(5-fluoro-2-hydroxyphenyl)acrylate, 3g**

Prepared according to general procedure, 5-fluoro-2-hydroxybenzaldehyde (10 mmol) was converted to ethyl (*E*)-3-(5-fluoro-2-hydroxyphenyl)acrylate in 2 hours yielding a white solide (1.39 g, 66%) after purification by column chromatography. 1H NMR (400 MHz, CDCl3) δ 8.00 (dd, *J* = 16.1, 1.2 Hz, 1H), 7.16 (dd, *J* = 9.2, 3.1 Hz, 1H), 6.95 (ddd, *J* = 8.8, 7.7, 3.1 Hz, 1H), 6.81 (dd, *J* = 8.9, 4.5 Hz, 1H), 6.57 (d, *J* = 16.2 Hz, 1H), 4.29 (q, *J* = 7.1 Hz, 2H), 1.35 (t, *J* = 7.1 Hz, 3H). 13C NMR (101 MHz, CDCl3) δ 168.09, 158.01, 155.64, 151.39, 151.37, 139.37, 139.35, 122.68, 122.61, 119.40, 118.12, 117.88, 117.39, 117.31, 114.45, 114.22, 77.34, 77.23, 77.02, 76.71, 60.90, 14.30. HRMS(ESI): m/z: calcd for [(C11H11FO3Na)+]: 233.0590; found: 233.0579.

**ethyl (*E*)-3-(2-hydroxy-5-nitrophenyl)acrylate, 3j**

Prepared according to general procedure, 2-hydroxy-5-nitrobenzaldehyde (10 mmol) was converted to ethyl (*E*)-3-(2-hydroxy-5-nitrophenyl)acrylate in 2 hours yielding a white solide (1.49 g, 63%) after purification by column chromatography. 1H NMR (400 MHz, DMSO-*d*6) δ 8.47 (d, *J* = 2.8 Hz, 1H), 8.11 (dd, *J* = 9.1, 2.8 Hz, 1H), 7.78 (d, *J* = 16.2 Hz, 1H), 7.06 (d, *J* = 9.1 Hz, 1H), 6.78 (d, *J* = 16.2 Hz, 1H), 4.18 (q, *J* = 7.1 Hz, 2H), 1.25 (t, *J* = 7.1 Hz, 3H). 13C NMR (101 MHz, DMSO-*d*6) δ 166.66, 162.87, 140.31, 138.30, 127.29, 125.51, 121.74, 120.82, 117.01, 60.58, 40.55, 40.34, 40.13, 39.92, 39.72, 39.51, 39.30, 14.62. HRMS(ESI): m/z: calcd for [(C11H11NO5Na)+]: 260.0535; found: 260.0519.

**General procedure for the synthesis of coumarin compounds**

The specified 2-hydroxyphenyl α,β-unsaturated carbonyl compound (0.2 mmol, 1 eq.) and *fac*-Ir(ppy)3 (0.002 mmol, 0.01 eq.) were dissolved in 2 mL MeCN, the mixture was stirred under blue LED irradiation for 24 h at room temperature. The reaction was monitored by GC-MS. After the reaction completed, MeCN was removed under reduced pressure. The crude product was purified by flash chromatography using *n*-hexane and ethyl acetate as eluent.

***2H*-chromen-2-one, 4a**

According to general procedure, *2H*-chromen-2-one was afforded as a white solid (27 mg, 94% yield). 1H NMR (400 MHz, CDCl3) δ 7.71 (d, *J* = 9.5 Hz, 1H), 7.59 – 7.45 (m, 2H), 7.37 – 7.26 (m, 2H), 6.43 (d, *J* = 9.5 Hz, 1H). 13C NMR (101 MHz, CDCl3) δ 160.78, 154.08, 143.41, 131.84, 127.85, 124.42, 118.85, 116.94, 116.74, 77.33, 77.02, 76.70. HRMS(ESI): m/z: calcd for [(C9H6O2Na)+]: 196.0256; found: 196.0222.

**8-methoxy-*2H*-chromen-2-one, 4b**

According to general procedure, 8-methoxy-*2H*-chromen-2-onewas afforded as a white solid (31 mg, 88%). 1H NMR (400 MHz, CDCl3) δ 7.68 (d, *J* = 9.6 Hz, 1H), 7.20 (t, *J* = 7.9 Hz, 1H), 7.07 (ddd, *J* = 10.1, 7.9, 1.4 Hz, 2H), 6.43 (d, *J* = 9.5 Hz, 1H), 3.96 (s, 3H). 13C NMR (101 MHz, CDCl3) δ 160.19, 147.27, 143.77, 143.59, 124.29, 119.47, 119.26, 116.96, 113.73, 77.36, 77.04, 76.72, 56.26. HRMS(ESI): m/z: calcd for [(C10H8O3Na)+]: 199.0371, found 199.0356.

**6-methyl-*2H*-chromen-2-one, 4c**

According to general procedure, 6-methyl-*2H*-chromen-2-onewas afforded as a white solid (30 mg, 94%). 1H NMR (400 MHz, CDCl3) δ 7.65 (d, *J* = 9.5 Hz, 1H), 7.32 (dd, *J* = 8.4, 2.1 Hz, 1H), 7.21 (d, *J* = 8.4 Hz, 1H), 6.39 (d, *J* = 9.5 Hz, 1H), 2.39 (s, 3H). 13C NMR (101 MHz, CDCl3) δ 161.06, 152.16, 143.42, 134.13, 132.82, 127.68, 118.58, 116.58, 116.57, 77.37, 77.06, 76.74, 20.73. HRMS(ESI): m/z: calcd for [(C10H8O2Na)+]: 183.0422, found 183.0475.

**6-chloro-*2H*-chromen-2-one, 4d**

According to general procedure, 6-chloro-*2H*-chromen-2-onewas afforded as a white solid (33 mg, 92%). 1H NMR (400 MHz, CDCl3) δ 7.64 (d, *J* = 9.6 Hz, 1H), 7.51 – 7.44 (m, 2H), 7.36 – 7.15 (m, 1H), 6.47 (d, *J* = 9.6 Hz, 1H). 13C NMR (101 MHz, CDCl3) δ 160.04, 152.44, 142.21, 131.78, 129.71, 127.13, 119.82, 118.35, 117.89, 77.36, 77.04, 76.72. HRMS(ESI): m/z: calcd for [(C9H5ClO2Na)+]: 202.9876, found 202.9876.

**6-bromo-*2H*-chromen-2-one, 4e**

According to general procedure, 6-bromo-*2H*-chromen-2-onewas afforded as a white solid (44 mg, 98%). 1H NMR (400 MHz, CDCl3) δ 7.67 – 7.57 (m, 3H), 7.22 (d, *J* = 9.6 Hz, 1H), 6.46 (d, *J* = 9.6 Hz, 1H). 13C NMR (101 MHz, CDCl3) δ 159.96, 152.92, 142.11, 134.60, 130.18, 120.32, 118.65, 117.87, 116.99, 77.36, 77.04, 76.72. HRMS(ESI): m/z: calcd for [(C9H5BrO2Na)+]: 246.9371, found 246.9320.

**6,8-dichloro-*2H*-chromen-2-one, 4f**

According to general procedure, 6,8-dichloro-*2H*-chromen-2-onewas afforded as a white solid (34 mg, 78%). 1H NMR (400 MHz, CDCl3) δ 7.75 – 7.52 (m, 2H), 7.40 (d, *J* = 2.4 Hz, 1H), 6.52 (d, *J* = 9.6 Hz, 1H). 13C NMR (101 MHz, CDCl3) δ 148.46, 141.94, 131.89, 129.58, 125.73, 120.62, 118.56, 77.34, 77.22, 77.02, 76.70. HRMS(ESI): m/z: calcd for [(C9H4Cl2O2Na)+]: 236.9486, found 236.9552.

**6-fluoro-*2H*-chromen-2-one, 4g**

According to general procedure, 6-fluoro-*2H*-chromen-2-onewas afforded as a white solid (30 mg, 90%). 1H NMR (400 MHz, CDCl3) δ 7.66 (d, *J* = 9.6 Hz, 1H), 7.31 (dd, *J* = 9.1, 4.5 Hz, 1H), 7.24 (ddd, *J* = 9.0, 7.9, 3.0 Hz, 1H), 7.18 (dd, *J* = 7.8, 2.9 Hz, 1H), 6.47 (d, *J* = 9.7 Hz, 1H). 13C NMR (101 MHz, CDCl3) δ 160.32, 159.93, 157.50, 150.19, 150.17, 142.48, 142.45, 119.52, 119.44, 119.36, 119.11, 118.48, 118.40, 117.88, 113.30, 113.06, 77.37, 77.05, 76.73. HRMS(ESI): m/z: calcd for [(C9H5FO2Na)+]: 187.0171, found 187.1013.

**6-hydroxy-*2H*-chromen-2-one, 4h**

According to general procedure, 6-hydroxy-*2H*-chromen-2-onewas afforded as a white solid (25 mg, 76%). 1H NMR (400 MHz, DMSO-*d*6) δ 10.58 (s, 1H), 7.93 (d, *J* = 9.4 Hz, 1H), 7.53 (d, *J* = 8.5 Hz, 1H), 6.79 (q, *J* = 2.2 Hz, 1H), 6.75 (s, 1H), 6.20 (d, *J* = 9.44 Hz, 1H). 13C NMR (101 MHz, DMSO-*d*6) δ 161.74, 160.91, 155.95, 145.01, 130.19, 113.58, 111.87, 111.74, 102.61, 40.57, 40.37, 40.16, 39.95, 39.74, 39.53, 39.32. HRMS(ESI): m/z: calcd for [(C9H6O3Na)+]: 185.0215, found 185.0206.

**7-(diethylamino)-*2H*-chromen-2-one, 4i**

According to general procedure, 7-(diethylamino)-2H-chromen-2-onewas afforded as a white solid (29 mg, 67%). 1H NMR (400 MHz, DMSO-*d*6) δ 7.82 (d, *J* = 9.3 Hz, 1H), 7.42 (d, *J* = 8.8 Hz, 1H), 6.68 (dd, *J* = 8.8, 2.5 Hz, 1H), 6.51 (d, *J* = 2.4 Hz, 1H), 5.98 (d, *J* = 9.3 Hz, 1H), 3.42 (q, *J* = 7.0 Hz, 4H), 1.11 (t, *J* = 7.0 Hz, 6H). 13C NMR (101 MHz, DMSO-*d*6) δ 161.47, 156.80, 150.93, 144.96, 129.78, 109.24, 108.63, 108.11, 97.06, 44.50, 40.59, 40.38, 40.17, 39.97, 39.85, 39.76, 39.55, 39.34, 12.77. HRMS(ESI): m/z: calcd for [(C13H15NO2Na)+]: 240.1000, found 240.1013.

**6-nitro-*2H*-chromen-2-one, 4j**

According to general procedure, 6-nitro-2H-chromen-2-onewas afforded as a white solid (28 mg, 73%). 1H NMR (400 MHz, CDCl3) δ 8.56 – 8.29 (m, 2H), 7.81 (d, *J* = 9.7 Hz, 1H), 7.47 (d, *J* = 9.0 Hz, 1H), 6.59 (d, *J* = 9.7 Hz, 1H). 13C NMR (101 MHz, CDCl3) δ 158.83, 157.57, 144.06, 142.20, 126.64, 123.75, 118.87, 118.81, 118.12, 77.34, 77.03, 76.71. HRMS(ESI): m/z: calcd for [(C9H5NO4Na)+]: 214.0116, found 214.0124.


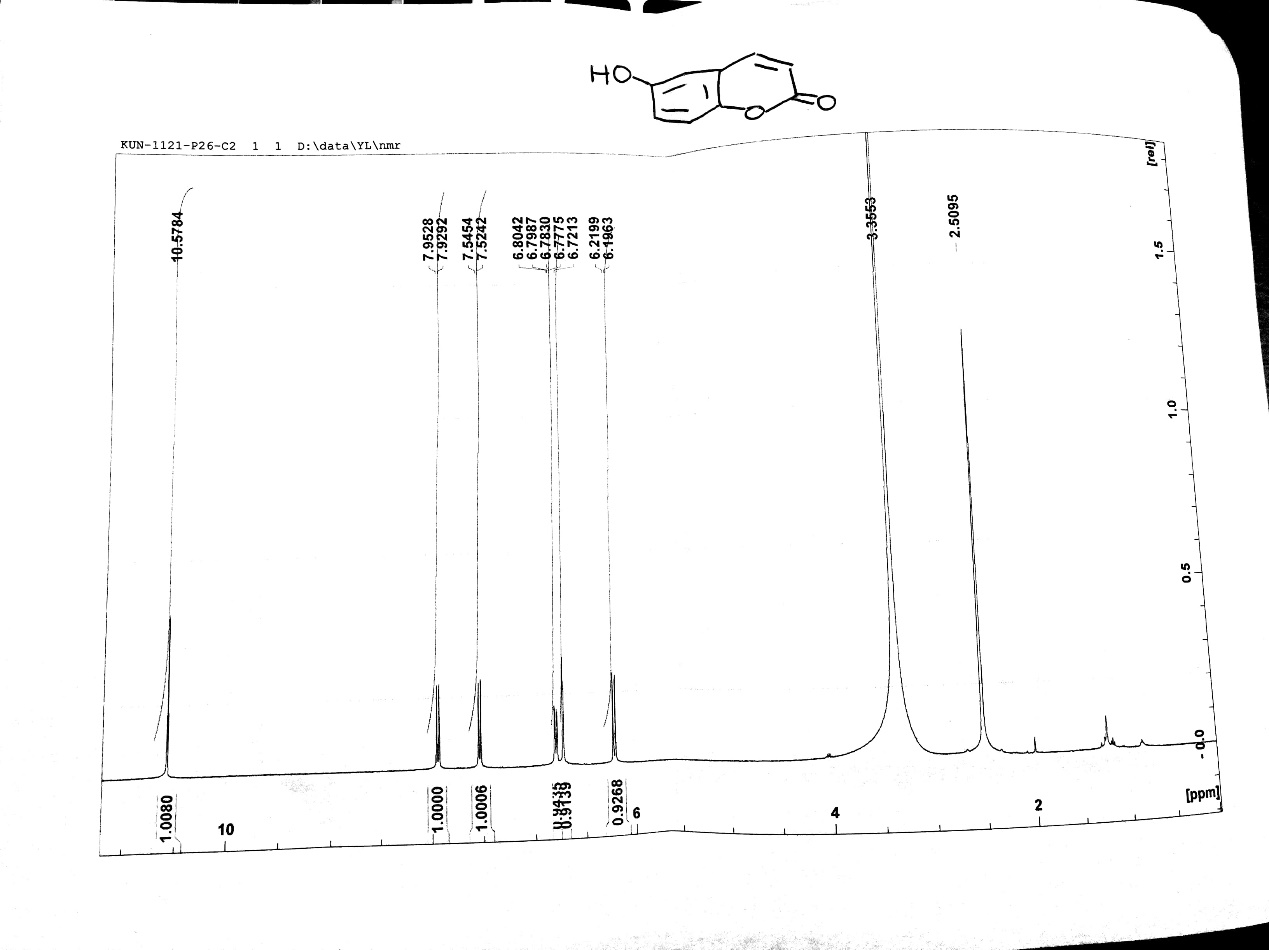

Supplement: s1 [file s1]
